# Supplementary material
Source: PubMed Central journal article supplement (PMC4871604)
Supplement: NIHMS752606-supplement-1.pdf [file NIHMS752606-supplement-1.pdf]

Clinical Evaluation of a Selected Etch and Three Step Total Etch Dental Adhesive in Class V Restorations

John O. Burgess (3M ESPE)

Proposal 000417709

**Proposal 000417709**

- Submissions (3)
- Awards (5)
- Approvals (1)
  - Human Subjects**
- Related Proposals (0)
- Attachments (15)
- COI Projects (1)

**Approvals**

|                                |                                                                                    |                                 |
|--------------------------------|------------------------------------------------------------------------------------|---------------------------------|
| Type <b>Human Subjects</b>     | Mode: <input checked="" type="radio"/> Attached <input type="radio"/> Not Attached | Status: Approved                |
| Approval Review Type: Original | Approval Review Category: WIRB                                                     | Reference No. <b>W110707003</b> |
| Approved: 16-Sep-2011          | Approved From:                                                                     | Approved To:                    |

**Additional Information**

Important Dates for Protocols Reviewed by WIRB ?

Protocol Sent to WIRB by OIRB ?

WIRB Approval Released by OIRB ?

You have opened this proposal in view mode
